# Supplementary material for: Epidemiological Data Mining for Assisting with Foodborne Outbreak Investigation
Source: MDPI journal article supplement (doi:10.3390/foods12203825), 2023-10-19
Supplement: s1 [file s1]

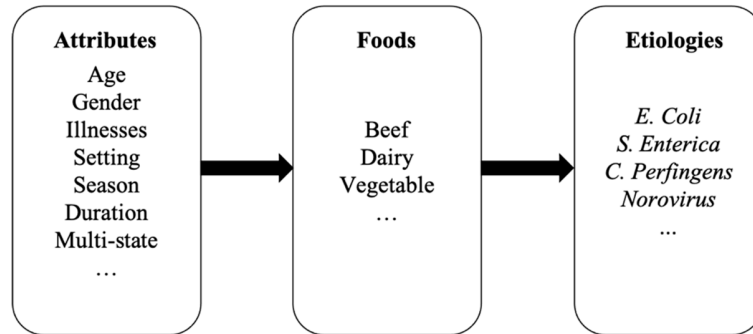

Figure S1. Schematic structure of the experiment design

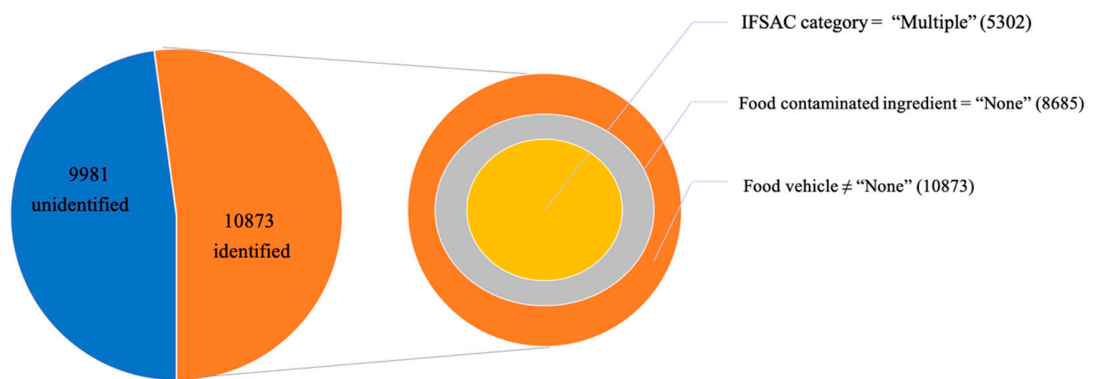

Figure S2. Basic statistics of the NORS dataset (left: number of foodborne outbreaks with identified or unidentified food vehicles; right: composition of the outbreaks with identified food vehicles.)

Table S1. Performance matrices of Classification model in predicting for four etiologies

| <b>Etiologies</b>                      | <b>precision</b> | <b>recall</b> | <b>f1-score</b> | <b>support</b> |
|----------------------------------------|------------------|---------------|-----------------|----------------|
| Salmonella enterica                    | 0.69             | 0.79          | 0.74            | 379            |
| Shiga toxin-producing Escherichia coli | 0.59             | 0.53          | 0.56            | 87             |
| Clostridium perfringens                | 0.57             | 0.42          | 0.48            | 110            |
| Norovirus genogroup I                  | 0.65             | 0.61          | 0.63            | 199            |
| Average / Total                        | 0.65             | 0.66          | 0.65            | 775            |

Table S2. Top 10 food items based on different centrality measures

| <i>Salmonella enterica</i>                              | <i>Norovirus genogroup I</i> | <i>Clostridium perfringens</i> | <i>Escherichia coli, Shiga toxin-producing</i> |
|---------------------------------------------------------|------------------------------|--------------------------------|------------------------------------------------|
| Top 10 food items of the highest degree centrality      |                              |                                |                                                |
| chicken                                                 | salad                        | gravy                          | ground_beef                                    |
| egg                                                     | lettuce                      | chicken                        | bean                                           |
| sandwich                                                | sandwich                     | roast_beef                     | salad                                          |
| cheese                                                  | vegetable                    | ground_beef                    | pork                                           |
| sauce                                                   | cheese                       | noodle                         | rice                                           |
| pie                                                     | ground_beef                  | rice                           | vegetable                                      |
| fish                                                    | ice                          | enchilada                      | meatball                                       |
| pork_bbq                                                | bread                        | taco                           | cheeseburger                                   |
| salad                                                   | pineapple                    | turkey                         | parsley                                        |
| beef                                                    | celery                       | mashed_potato                  | house_salad                                    |
| Top 10 food items of the highest betweenness centrality |                              |                                |                                                |
| chicken                                                 | salad                        | gravy                          | ground_beef                                    |
| egg                                                     | lettuce                      | roast_beef                     | bean                                           |
| sandwich                                                | tortilla                     | chicken                        | salad                                          |
| sauce                                                   | sandwich                     | ground_beef                    | vegetable                                      |
| salad                                                   | cheese                       | noodle                         | meatball                                       |
| cheese                                                  | vegetable                    | rice                           | cheeseburger                                   |
| fish                                                    | bread                        | enchilada                      | pork                                           |
| ice_cream                                               | potato_salad                 | taco                           | parsley                                        |
| homemade                                                | ground_beef                  | turkey                         | house_salad                                    |
| rice                                                    | ice                          | mashed_potato                  | dip                                            |
| Top 10 food items of the highest closeness centrality   |                              |                                |                                                |
| sandwich                                                | salad                        | gravy                          | ground_beef                                    |
| chicken                                                 | lettuce                      | roast_beef                     | bean                                           |
| egg                                                     | sandwich                     | turkey                         | meatball                                       |
| sauce                                                   | bread                        | mashed_potato                  | cheeseburger                                   |
| cheese                                                  | pasta                        | sausage                        | hamburger                                      |
| poultry                                                 | vegetable                    | gravy_beef                     | steak                                          |
| salad                                                   | tortilla                     | chicken                        | pork                                           |
| cilantro                                                | potato_salad                 | ground_beef                    | rice                                           |
| ham                                                     | fruit                        | shredded                       | salad                                          |
| tomato                                                  | punch                        | meatball                       | dip                                            |
| Top 10 food items of the highest eigenvector centrality |                              |                                |                                                |
| chicken                                                 | salad                        | gravy                          | vegetable                                      |
| egg                                                     | lettuce                      | roast_beef                     | salad                                          |
| sandwich                                                | sandwich                     | turkey                         | meatball                                       |
| sauce                                                   | bread                        | mashed_potato                  | ground_beef                                    |
| cheese                                                  | vegetable                    | sausage                        | cheeseburger                                   |
| cilantro                                                | pasta                        | gravy_beef                     | bean                                           |
| poultry                                                 | punch                        | chicken                        | pork                                           |

|        |              |             |             |
|--------|--------------|-------------|-------------|
| tomato | fruit        | ground_beef | parsley     |
| ham    | potato_salad | shredded    | house_salad |
| rice   | seafood      | meatball    | dip         |

Table S3. Most common ingredients of “complex” foods from Monte Carlo simulation

| <b>Salad</b>   | <b>Sandwich</b> | <b>Pizza</b>  | <b>Taco</b> | <b>Pasta</b>   | <b>Lasagna</b> |
|----------------|-----------------|---------------|-------------|----------------|----------------|
| Parsley        | Salt            | Pineapple     | Olives      | Cream          | Salt           |
| Olives         | Olives          | Salt          | Cream       | Salt           | Cream          |
| Salt           | Grapes          | Cheese        | Garlic      | Garlic         | Garlic         |
| Sauerkraut     | Cream           | Peppers       | Salt        | Milk           | Milk           |
| Fat            | Cheese          | Chicken       | Cheese      | Cheese         | Cheese         |
| Cheese         | Vinegar         | Onions        | Vinegar     | Fat            | Fat            |
| Lettuce        | Fat             | Oil           | Lettuce     | Crackers       | Margarine-like |
| Margarine-like | Lettuce         | Squash        | Lime juice  | Margarine-like | spread         |
| spread         | Watercress      | Mushrooms     | Oil         | spread         | Peppers        |
| Dressing       | Lemon juice     | Fat           | Peppers     | Chicken        | Oil            |
| Lemon juice    | Chicken         | Juice         | Chicken     | Oil            | Onions         |
| Pork           | Oil             | Pickle        | Onions      | Corn           | Celery         |
| Oil            | Onions          | Pimento       | Fat         | Onions         | Spinach        |
| Chicken        | Fish            | Pork          | Fish        | Carrots        | Carrots        |
| Salami         | Celery          | Sweet chili   | Egg         | Broccoli       | Broccoli       |
| Fish           | Spinach         | pepper        | Juice       | Dressing       | Mushrooms      |
| Cucumber       | Cucumber        | Sugars        | Lime        | Egg            | Eggplant       |
| Onions         | Carrots         | Milk          | Rice        | Beef           | Egg            |
| Turkey         | Radish          | Vegetable oil | Dressing    | Margarine      | Squash         |
| Celery         | Beef            | Bread         | Tortillas   | Pork           | Dressing       |
| Tomato         |                 | Sausage       |             | Tomato         | Beef           |

Table S4. Contaminated ingredients associated with “complex” foods in historical outbreaks

| <b>Salad</b> | <b>Sandwich</b> | <b>Pizza</b> | <b>Taco</b> | <b>Pasta</b> | <b>Lasagna</b> |
|--------------|-----------------|--------------|-------------|--------------|----------------|
| Leafy green  | Leafy green     | Pork         | Beef        | Egg          | Egg            |
| Tomato       | Chicken         | Cheese       | Chicken     | Vine-stalk   | Beef           |
| Chicken      | Lettuce         | Chicken      | Fish        | Tomato       |                |
| Lettuce      | Bread           | Mushrooms    | Legume      | Dressings    |                |
| Egg          | Tomato          | Cream        | Mahi        | Potato       |                |
| Potato       | Beef            | Bread        | Pork        | Root         |                |
| Root         | Turkey          | Fruit        | Egg         | Sauces       |                |
| Vine-stalk   | Pork            | Lettuce      | Fungus      | Shrimp       |                |
| Dressings    | Cheese          | Dressings    | Leafy green | Beans        |                |
| Cheese       | Vine-stalk      | Garlic       | Lettuce     | Chicken      |                |
| Sauces       | Egg             | Broccoli     | Pork        | Leafy green  |                |
| Fruit        | Fish            | Beef         | Spices      | Mussels      |                |
| Pork         | Fin             | Basil        | Tortillas   |              |                |
| Fish         | Fruit           | Potato       | Wraps       |              |                |
| Onion        | Ham             | Root         | Wahoo       |              |                |
| Cucumber     | Potato          | Salt         |             |              |                |
| Shellfish    | Mayonnaise      | Sausage      |             |              |                |
| Turkey       | Basil           | Sourdough    |             |              |                |
| Tuna         | Root            | Sugar        |             |              |                |
| Beef         | Onion           | Sauces       |             |              |                |
| Water        | Mushroom        | Tomato       |             |              |                |
| Carrots      | Deli meat       |              |             |              |                |
| Celery       | Peppers         |              |             |              |                |
| Pineapple    | Pickles         |              |             |              |                |
| Grapes       | Sprouts         |              |             |              |                |
| Cream        |                 |              |             |              |                |
| Basil        |                 |              |             |              |                |
| Vinegar      |                 |              |             |              |                |
| Melon        |                 |              |             |              |                |
